# Supplementary material for: House Dust Mite-Derived Chitin Enhances Th2 Cell Response to Inhaled Allergens, Mainly via a TNF-α-Dependent Pathway
Source: PubMed Central journal article supplement — Allergy Asthma Immunol Res. 2016 Mar 28;8(4):362–74. doi: 10.4168/aair.2016.8.4.362 (PMC4853514; doi:10.4168/aair.2016.8.4.362), 2016-03-28
Supplement: aair-8-362-s001.pdf [file aair-8-362-s001.pdf]

## SUPPLEMENTARY

For Fig. 1 &amp; Fig. S2

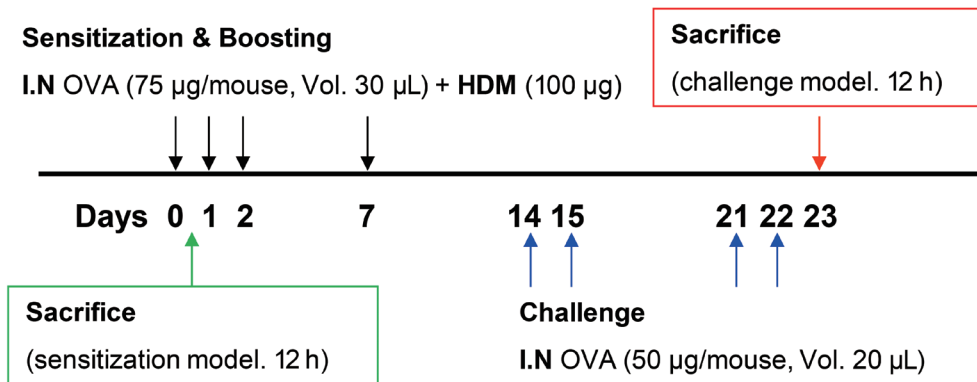

For Fig. 2 - Fig. 6 &amp; Fig. S3

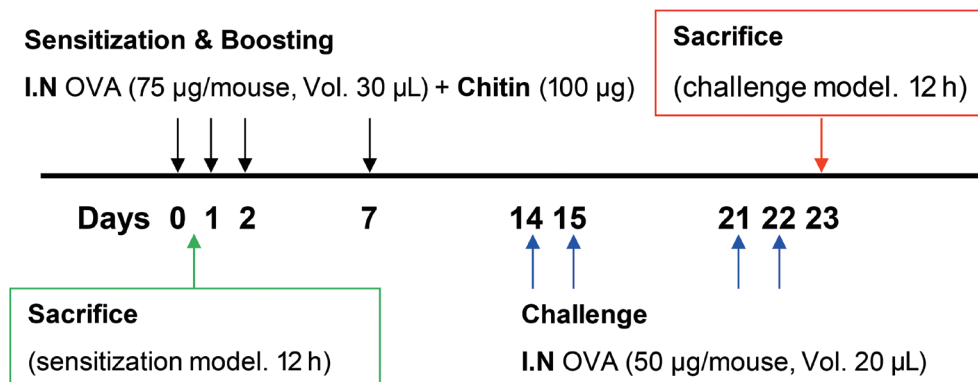

For Fig. 2B-C, Fig. 3A-B &amp; Fig. S4

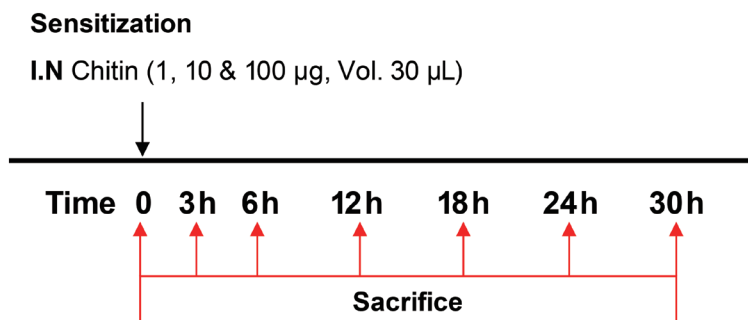

Supplementary Fig. 1. Schematic protocols for animal models.
