# Supplementary material for: House Dust Mite-Derived Chitin Enhances Th2 Cell Response to Inhaled Allergens, Mainly via a TNF-α-Dependent Pathway
Source: PubMed Central journal article supplement — Allergy Asthma Immunol Res. 2016 Mar 28;8(4):362–74. doi: 10.4168/aair.2016.8.4.362 (PMC4853514; doi:10.4168/aair.2016.8.4.362), 2016-03-28
Supplement: aair-8-362-s002.pdf [file aair-8-362-s002.pdf]

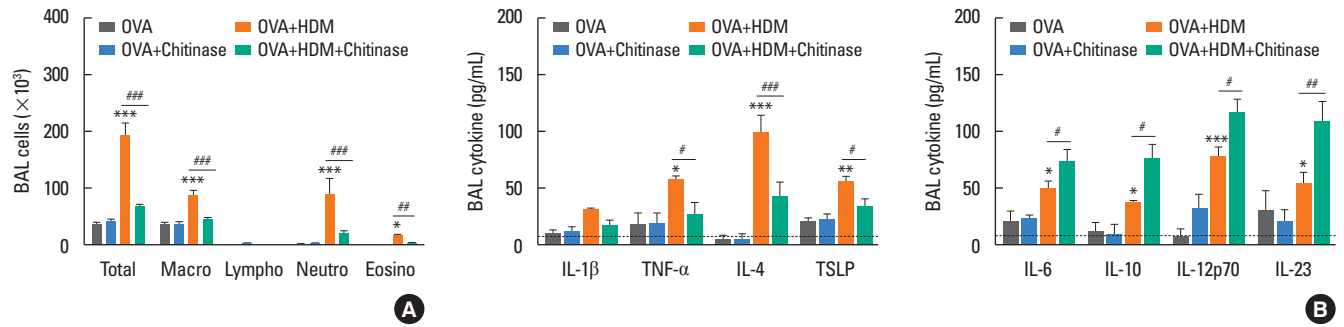

**Supplementary Fig. 2.** Effect of chitinase on the development of airway inflammation and cytokine production induced by HDM-derived chitin. For all panels, wild-type mice (C57BL/6 background) were sensitized with 75  $\mu$ g of OVA + 100  $\mu$ g of HDM with or without chitinase, and evaluated 24 hours after the last OVA challenge. Data are presented as the mean  $\pm$  SEM ( $n=5$  mice per group) are from a single experiment representative of at least two independent experiments. \* $P<0.05$ ; \*\* $P<0.01$ ; \*\*\* $P<0.001$  relative to each control groups, OVA or OVA + Chitinase, respectively; # $P<0.05$ ; ## $P<0.01$ ; ### $P<0.001$ . Bars in cytokine graphs mean sensitivity limitation. (A) Bronchoalveolar lavage (BAL) cellularity level after sensitization. (B) Production of IL-1 $\beta$ , TNF- $\alpha$ , IL-4, TSLP, IL-6, IL-10, IL-12p70, and IL-23 in BAL fluid after sensitization.
