# Supplementary material for: House Dust Mite-Derived Chitin Enhances Th2 Cell Response to Inhaled Allergens, Mainly via a TNF-α-Dependent Pathway
Source: PubMed Central journal article supplement — Allergy Asthma Immunol Res. 2016 Mar 28;8(4):362–74. doi: 10.4168/aair.2016.8.4.362 (PMC4853514; doi:10.4168/aair.2016.8.4.362), 2016-03-28
Supplement: aair-8-362-s003.pdf [file aair-8-362-s003.pdf]

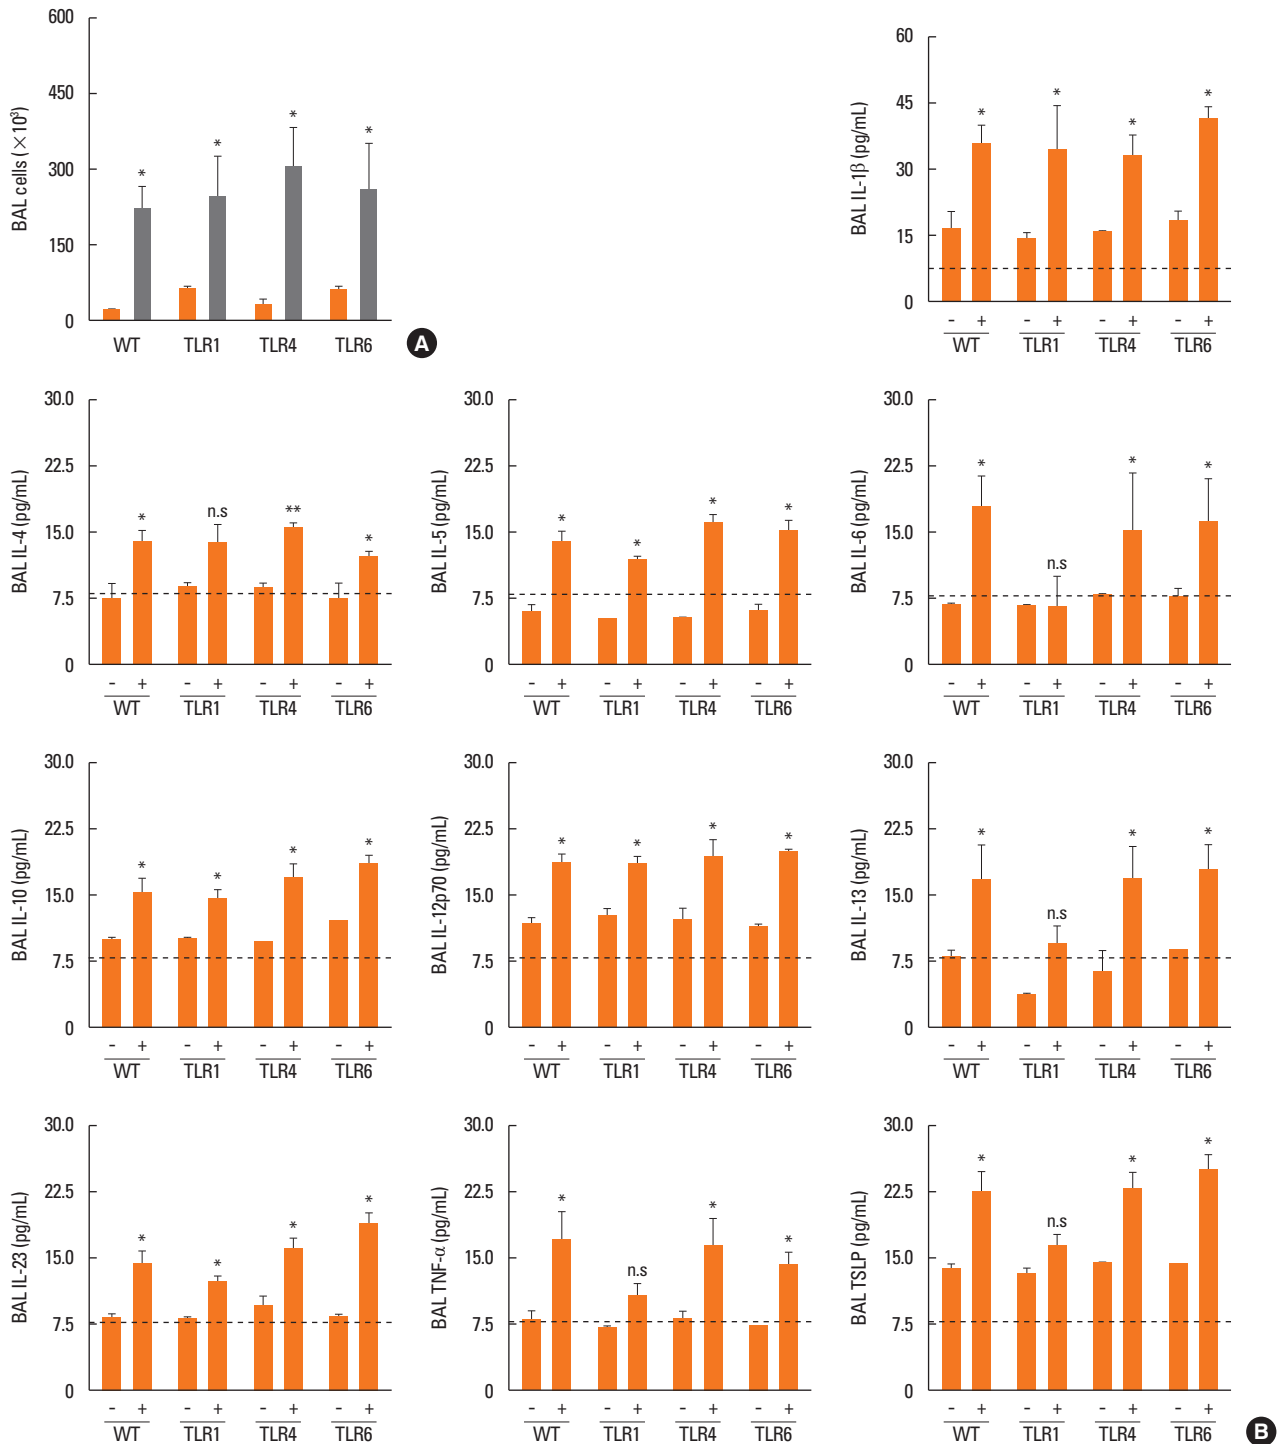

**Supplementary Fig. 3.** Immune responses of Th2, Th17, and Th1 induced by airway sensitization with ovalbumin (OVA) plus house dust mite (HDM) derived chitin are not mediated by toll-like receptor (TLR) 1, TLR 4, or TLR 6. For all panels, TLR-deficient mice and wild-type mice (C57BL/6 background) were sensitized with 75  $\mu$ g of OVA, or 75  $\mu$ g of OVA + 100  $\mu$ g of HDM derived chitin, and then evaluated 12 hours after the sensitization. \* $P < 0.05$  relative to wild-type OVA group; n.s., not significant. Data are presented as the mean  $\pm$  SEM ( $n = 5$  mice per group). Bars in cytokine graphs mean sensitivity limitation. (A) Bronchoalveolar lavage (BAL) cellularity after sensitization. (B) Levels of IL-1 $\beta$ , IL-4, IL-5, IL-6, IL-10, IL-12p70, IL-13, IL-23, TNF- $\alpha$ , and TSLP in BAL fluid after sensitization. +, sensitized; -, not sensitized.
