# Supplementary material for: House Dust Mite-Derived Chitin Enhances Th2 Cell Response to Inhaled Allergens, Mainly via a TNF-α-Dependent Pathway
Source: PubMed Central journal article supplement — Allergy Asthma Immunol Res. 2016 Mar 28;8(4):362–74. doi: 10.4168/aair.2016.8.4.362 (PMC4853514; doi:10.4168/aair.2016.8.4.362), 2016-03-28
Supplement: aair-8-362-s004.pdf [file aair-8-362-s004.pdf]

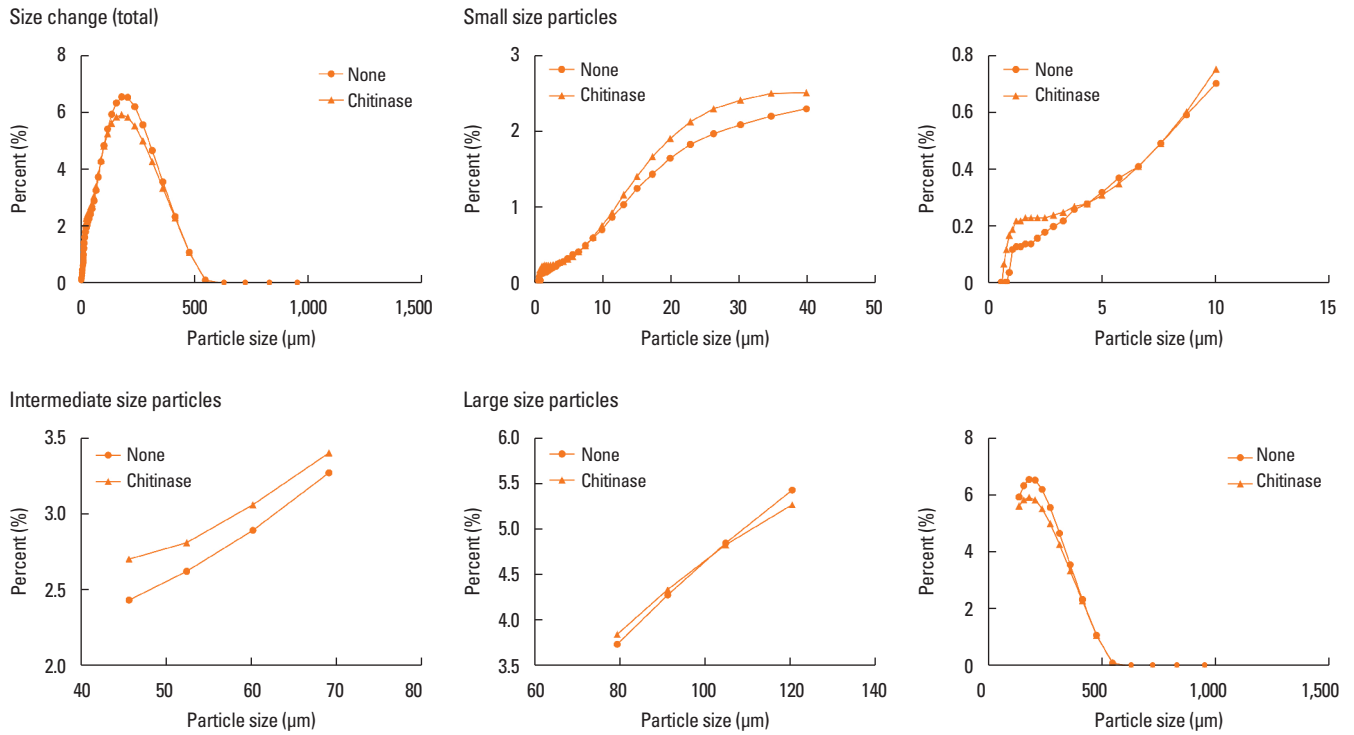

**Supplementary Fig. 4.** Size alteration after chitinase treatment. Chitinase was added to HDM derived chitin and incubated for 1 hour in 37°C. The reaction was done in 1 mL of filtered PBS, and stopped by heating step (100°C, 10 minutes). After enzyme digestion, 2 L of distilled water was added for size analysis. Particle size was evaluated by Mastersizer 2000 (Malvern, Worcestershire, UK).
