# Supplementary material for: House Dust Mite-Derived Chitin Enhances Th2 Cell Response to Inhaled Allergens, Mainly via a TNF-α-Dependent Pathway
Source: PubMed Central journal article supplement — Allergy Asthma Immunol Res. 2016 Mar 28;8(4):362–74. doi: 10.4168/aair.2016.8.4.362 (PMC4853514; doi:10.4168/aair.2016.8.4.362), 2016-03-28
Supplement: aair-8-362-s005.pdf [file aair-8-362-s005.pdf]

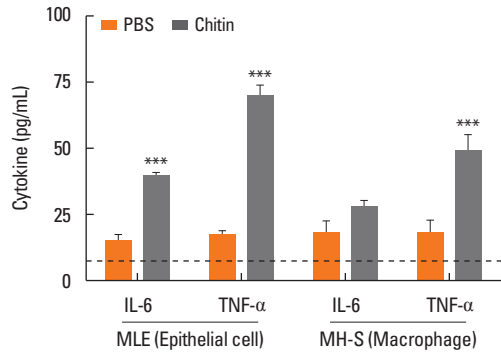

**Supplementary Fig. 5.** HDM derived chitin induce inflammatory cytokines in lung epithelial cell and macrophages. MLE and MH-S cells were stimulated with isolated chitin (100  $\mu\text{g}/\text{mL}$ ) and levels of IL-6 and TNF- $\alpha$  were measured in culture supernatants.  $5 \times 10^5$  cells were incubated in DMEM or RPMI 1640 media on 24 well plate. Cells were stimulated during 24 hours and then supernatants were harvested and evaluated. \*\*\* $P < 0.001$  relative to wild-type group. Bars in cytokine graphs mean sensitivity limitation.
